# Supplementary material for: Dispersing agglomerated Zn4In2S7 on g-C3N4 nanosheets to form a 2D/2D S-scheme heterojunction for highly selective photocatalytic cleavage of lignin models
Source: Royal Society of Chemistry journal article supplement (doi:10.1039/d4cy00098f), 2024-01-01
Supplement: d4cy00098f1.pdf [file d4cy00098f1.pdf]

## Supporting Information

### Dispersing Agglomerated Zn<sub>4</sub>In<sub>2</sub>S<sub>7</sub> on g-C<sub>3</sub>N<sub>4</sub> Nanosheets to Form 2D/2D S-Scheme Heterojunction for Highly Selective Photocatalytic Cleavage of Lignin Models

Yitong Lu<sup>a,†</sup>, Yu Fan<sup>a,†</sup>, Shuai Xu<sup>a</sup>, Yuliang Li<sup>a,\*</sup>

<sup>a</sup>Key Laboratory of Subsurface Hydrology and Ecological Effects in Arid Region, Ministry of Education, School of Water and Environment, Chang'an University, Xi'an, 710064, China.

\* Corresponding authors.

E-mail address: yulianglee@hotmail.com (Y. Li).

#### S1. Quantification of the reaction.

$$\text{Conversion of PP-ol (\%)} = \frac{\text{peak area of reacted PP - ol}}{\text{peak area of PP - ol input}} \times 100\%$$

$$\text{Yield of PP-one (\%)} = \frac{\text{moles of PP - one formed}}{\text{moles of PP - ol input}} \times 100\%$$

Unless otherwise specified, yields of other products (AP, Phol, BBE, PF) were calculated by the same way as that for PP-one employing the moles of the specific products. At the same time, The moles of products and by-products are calculated by the fitted moles-peak area standard curve formula (Fig. S1).

#### S2. Theoretical computation method.

The density functional theory (DFT) calculations of work function (WF) were performed using the Quantum Espresso with the Perdew Burke Ernzerhof (PBE) functional [1,2]. The Kohn-Sham one-electron valence states were expanded in a plane

wave basis set with a kinetic energy cutoff of 450 eV. The surface was simulated by the slab model, and a larger than 15 Å of vacuum layer was used to eliminate the interaction between periodic images. The work function was evaluated according to Equation (1):

$$WF = E_{vac} - E_f \quad (1)$$

where WF,  $E_{vac}$ , and  $E_f$  represent work function, vacuum level, and Fermi level, respectively.

**Table S1**

Summary of energetic properties for CN and ZIS.

| Catalysts | $E_g/\text{eV}$ | $E_{fb}/\text{eV}$ vs. Ag/AgCl | $E_{fb}/\text{eV}$ vs. NHE | $E_{cb}/\text{eV}$ | $E_{vb}/\text{eV}$ |
|-----------|-----------------|--------------------------------|----------------------------|--------------------|--------------------|
| CN        | 2.91            | -1.33                          | -1.13                      | -1.23              | 1.68               |
| ZIS       | 2.47            | -0.62                          | -0.42                      | -0.52              | 1.95               |

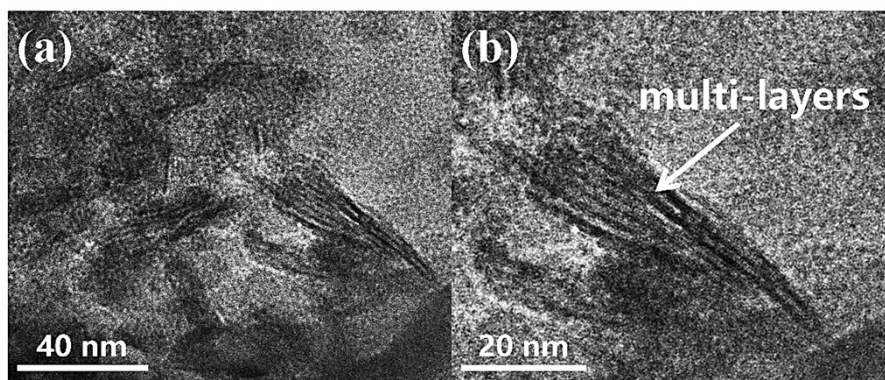

**Fig. S1.** TEM images of  $\text{Zn}_4\text{In}_2\text{S}_7$ .

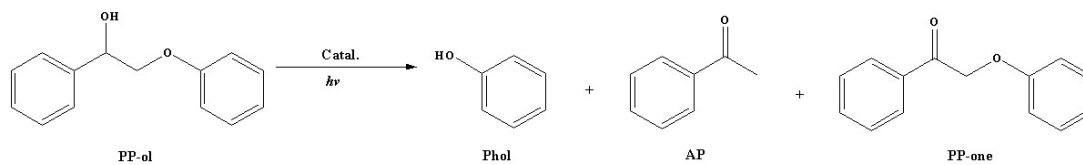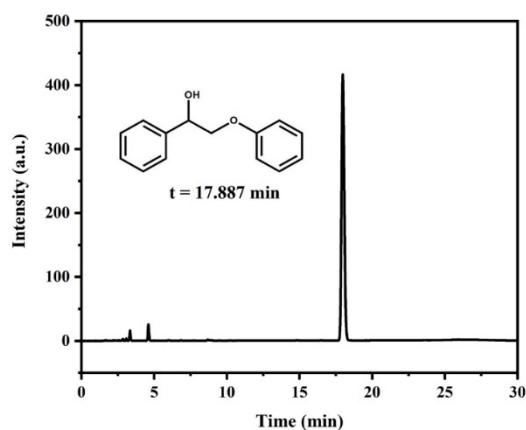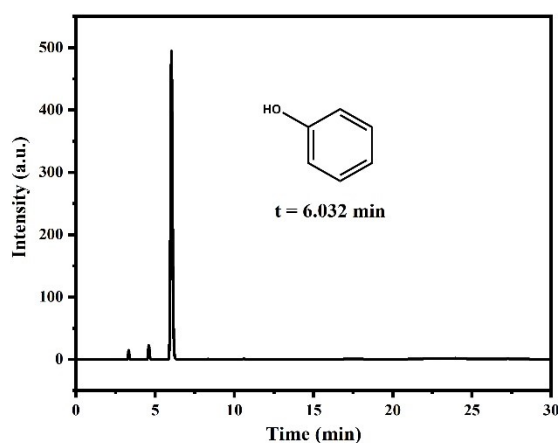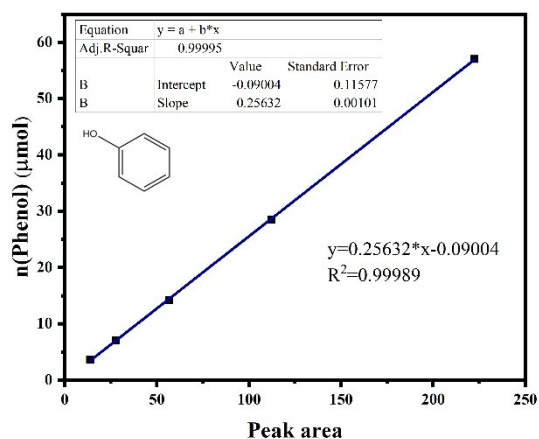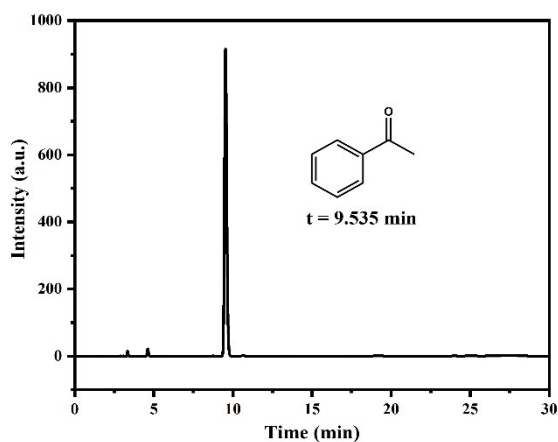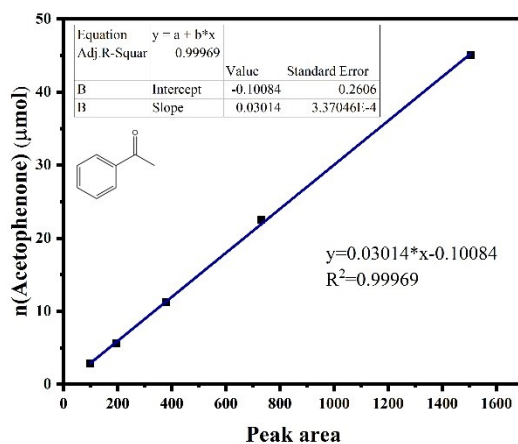

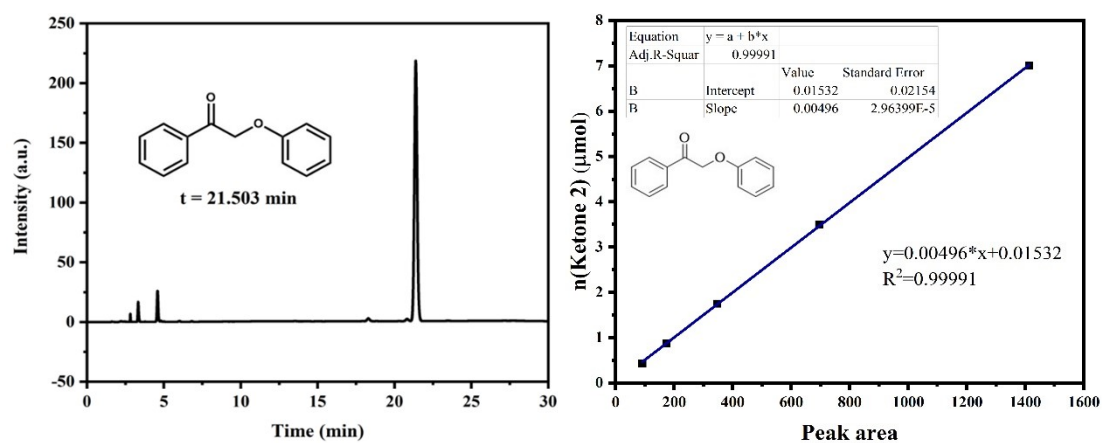

**Fig. S2.** HPLC spectra and quantitative analysis of PP-ol and its C-O bond breaking products.

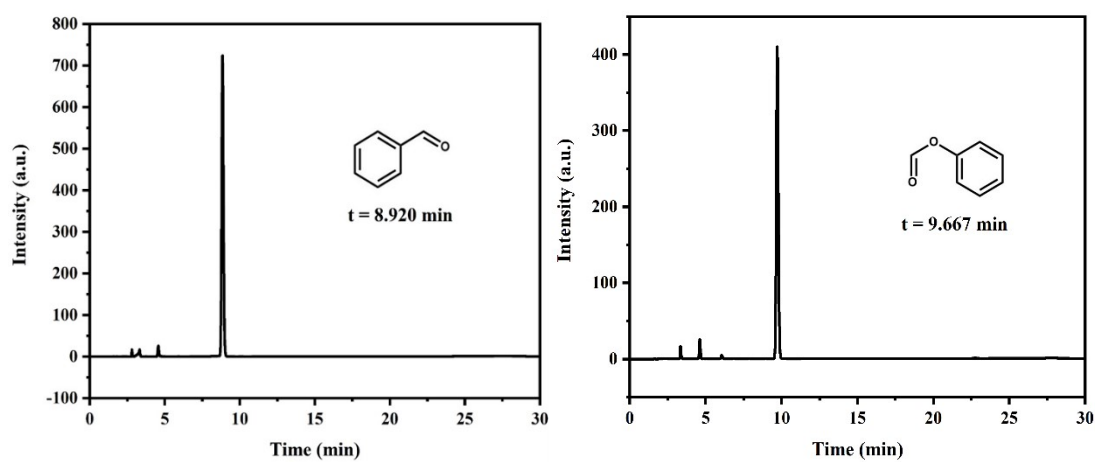

**Fig. S3.** HPLC spectra of the by-products of broken PP-ol C-C bond.

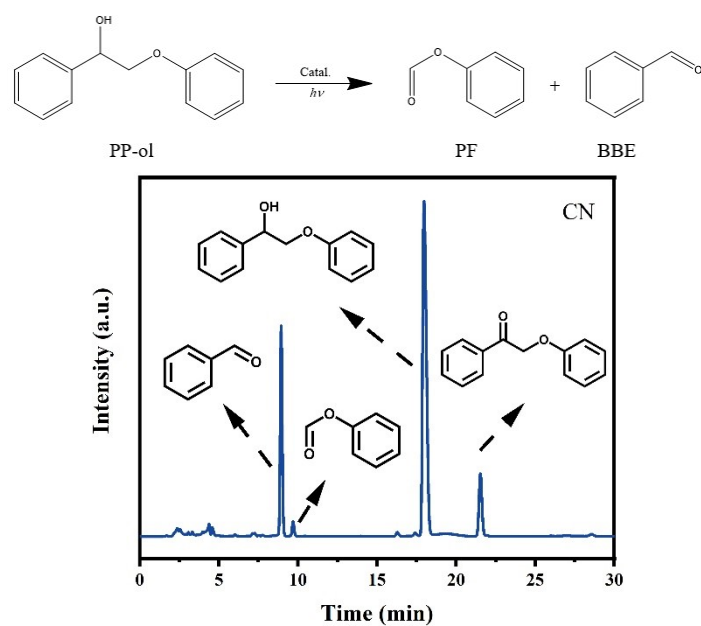

**Fig. S4.** The by-products that break the C-C bond of PP-ol.

**Table S2**

Adsorption of pp-ol by CN and ZCN materials after 3h.

| Catalyst                | CN  | ZIS | ZCN-100 | ZCN-200 | ZCN-300 | ZCN-400 |
|-------------------------|-----|-----|---------|---------|---------|---------|
| Adsorption capacity (%) | 3.4 | 2.2 | 2.6     | 2.1     | 2.5     | 2.2     |

## References

- [1] P. Giannozzi, S. Baroni and N. Bonini, *J. Phys.: Condens. Matter*, 2009, **21**, 395502.
- [2] J. P. Perdew, K. Burke and M. Ernzerhof, *Phys. Rev. Lett.*, 1996, **77**, 3865–3868.
